# Supplementary material for: A fluorescence–Raman dual-imaging platform based on complexes of conjugated polymers and carbon nanotubes
Source: Royal Society of Chemistry journal article supplement (doi:10.1039/c3nr04430k), 2013-11-12
Supplement: c3nr04430k.pdf [file c3nr04430k.pdf]

## Supporting Information

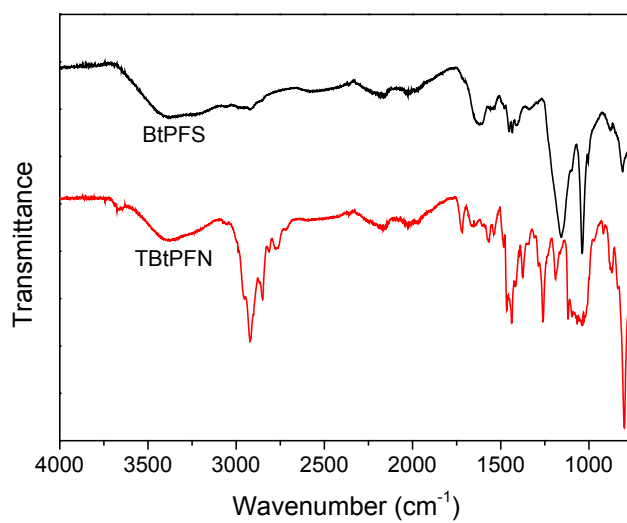

Fig. S1 FT-IR spectra of BtPFS and TBtPFN.

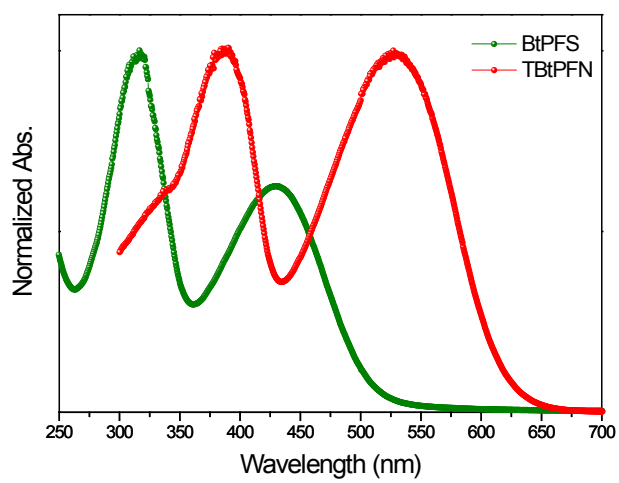

Fig. S2 UV spectra of BtPFS and TBtPFN.
